# Supplementary material for: Relationship between insulin-like growth factor axis gene polymorphisms and clinical outcome in advanced gastric cancer patients treated with FOLFOX
Source: PubMed Central journal article supplement (PMC5058750; doi:10.18632/oncotarget.9100), 2016-04-29
Supplement: oncotarget-07-31204-s001.pdf [file oncotarget-07-31204-s001.pdf]

## Relationship between insulin-like growth factor axis gene polymorphisms and clinical outcome in advanced gastric cancer patients treated with FOLFOX

### Supplementary Materials

**Supplementary Table S1: Analyzed SNPs of IGF axis genes.** See Supplementary\_Table\_S1

**Supplementary Table S2: Primer sequences for SNPs of IGF axis genes.** See Supplementary\_Table\_S2

### Supplementary Table S3: Combination of risk alleles

| No of risk allele* | No. of patients | HR for PFS (95 CI) | <i>P</i> value |
|--------------------|-----------------|--------------------|----------------|
| 1                  | 24              | 1.0                |                |
| 2                  | 19              | 0.64 (0.09–4.17)   | 0.643          |
| 3                  | 128             | 0.65 (0.18–2.41)   | 0.529          |
| 4                  | 10              | 1.21 (0.12–11.81)  | 0.865          |

HR, hazard ratio; PFS, progression free survival; CI, confidence interval;

\*Risk alleles: A for rs7166558, G for rs2229765, G for rs12437963, T/T for rs2872060 and T for rs17847203.
